# Supplementary material for: Tuning d ‐spacing of graphene oxide nanofiltration membrane for effective dye/salt separation
Source: Springer Nature journal article supplement (doi:10.1007/s12598-022-02153-4), 2022-11-22
Supplement: MOESM1 [file 23748888]

## Supporting Information

### **Tuning *d*-spacing of graphene oxide nanofiltration membrane for effective dye/salt separation**

**Chao Xing <sup>a,c,\*</sup>, Chang-Yu Liu <sup>b,\*</sup> (iD 0000-0003-2717-3684), Chao Lai <sup>c</sup> (iD 0000-0002-6021-6343), Shan-Qing Zhang <sup>a,\*</sup> (iD 0000-0001-5192-1844)**

C. Xing <sup>a,c,\*</sup>

<sup>a</sup> Center for Clean Environment and Energy, School of Environment and Science, Gold Coast Campus, Griffith University, QLD 4222, Australia

<sup>c</sup> School of Chemistry and Materials Science, Jiangsu Normal University, Xuzhou, 221116, PR China

e-mail: [chao.xing@griffithuni.edu.au](mailto:chao.xing@griffithuni.edu.au)

C.-Y. Liu <sup>b,\*</sup>

<sup>b</sup> School of Biotechnology and Health Sciences, Wuyi University, Jiangmen 529020, PR China

e-mail: [wyuchemcyliu@126.com](mailto:wyuchemcyliu@126.com)

C. Lai <sup>c</sup>

<sup>c</sup> School of Chemistry and Materials Science, Jiangsu Normal University, Xuzhou, 221116, PR China

S.-Q. Zhang <sup>a,\*</sup>

<sup>a</sup> Center for Clean Environment and Energy, School of Environment and Science,  
Gold Coast Campus, Griffith University, QLD 4222, Australia

e-mail: [s.zhang@griffith.edu.au](mailto:s.zhang@griffith.edu.au)

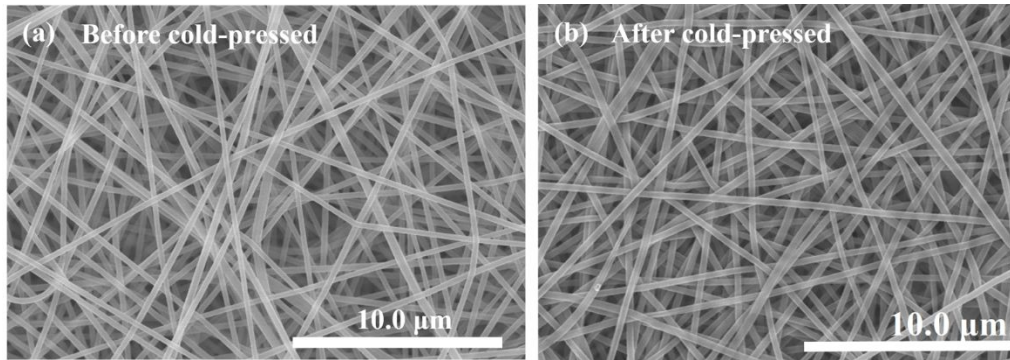

**Figure S1.** The typical SEM images of the PAN substrate before (a) and after (b) cold-pressed.

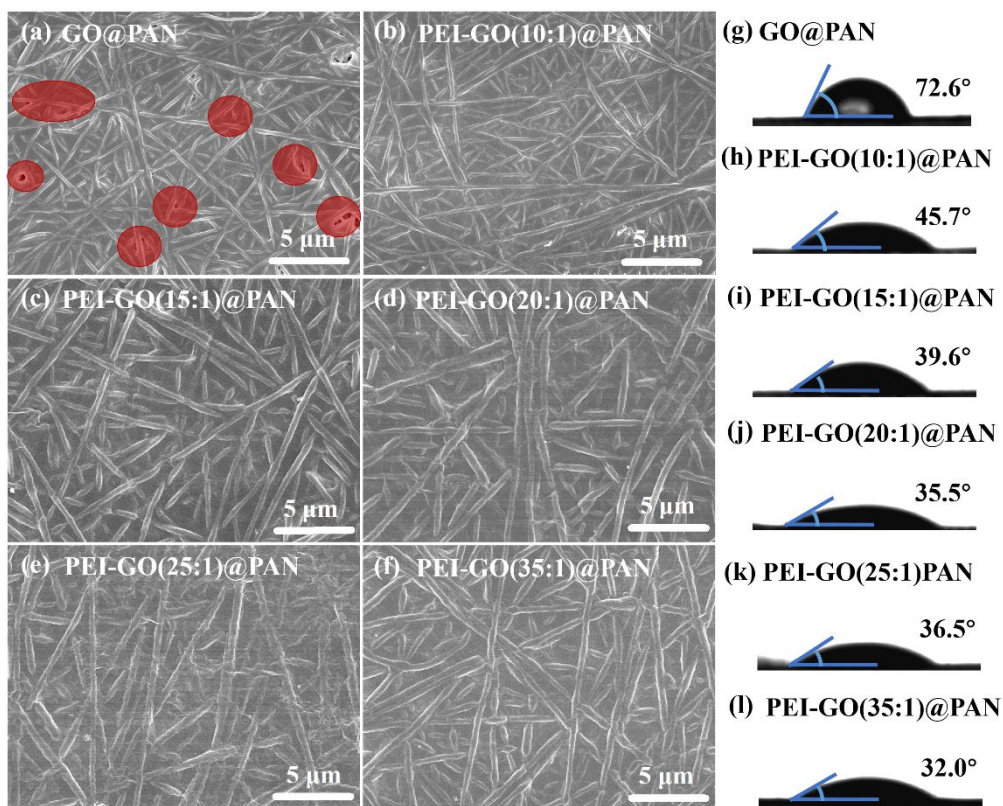

**Figure S2.** (a-f) Surface SEM images of GO@PAN membrane and PEI-GO@PAN membranes; (g-l) The water contact angles of GO@PAN membrane and PEI-GO@PAN membranes.

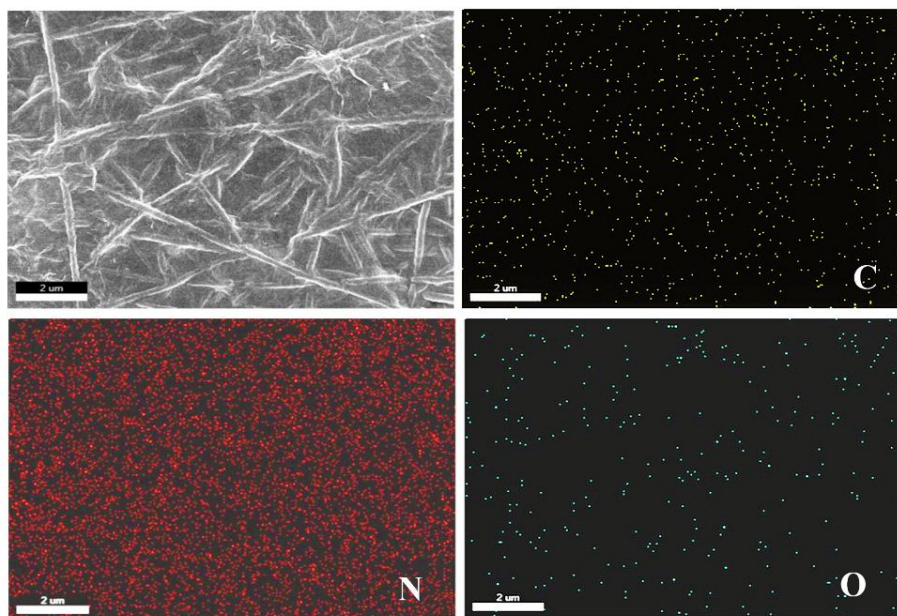

**Figure S3.** The EDS spectra of the PEI-GO(15:1)@PAN membrane.

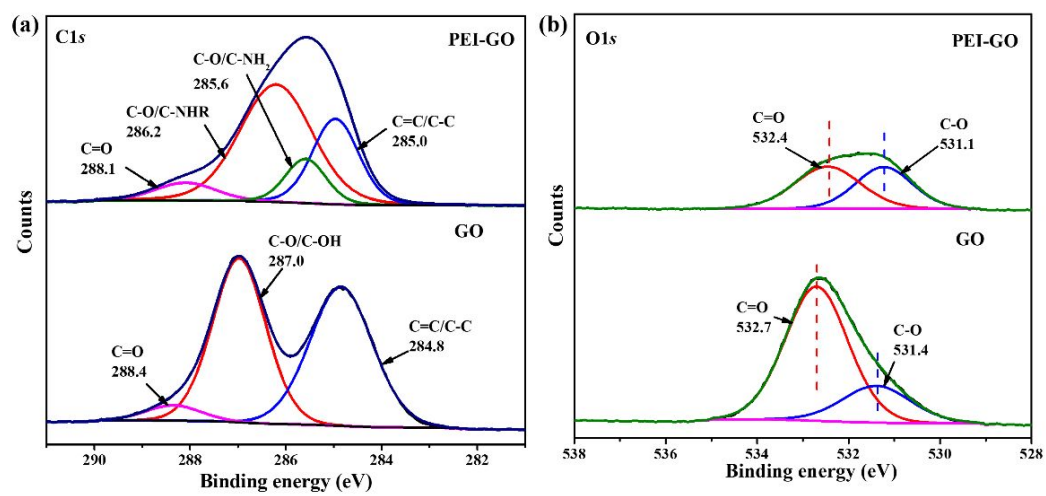

**Figure S4.** The XPS spectra of C=O in C 1s (a) and O 1s (b).

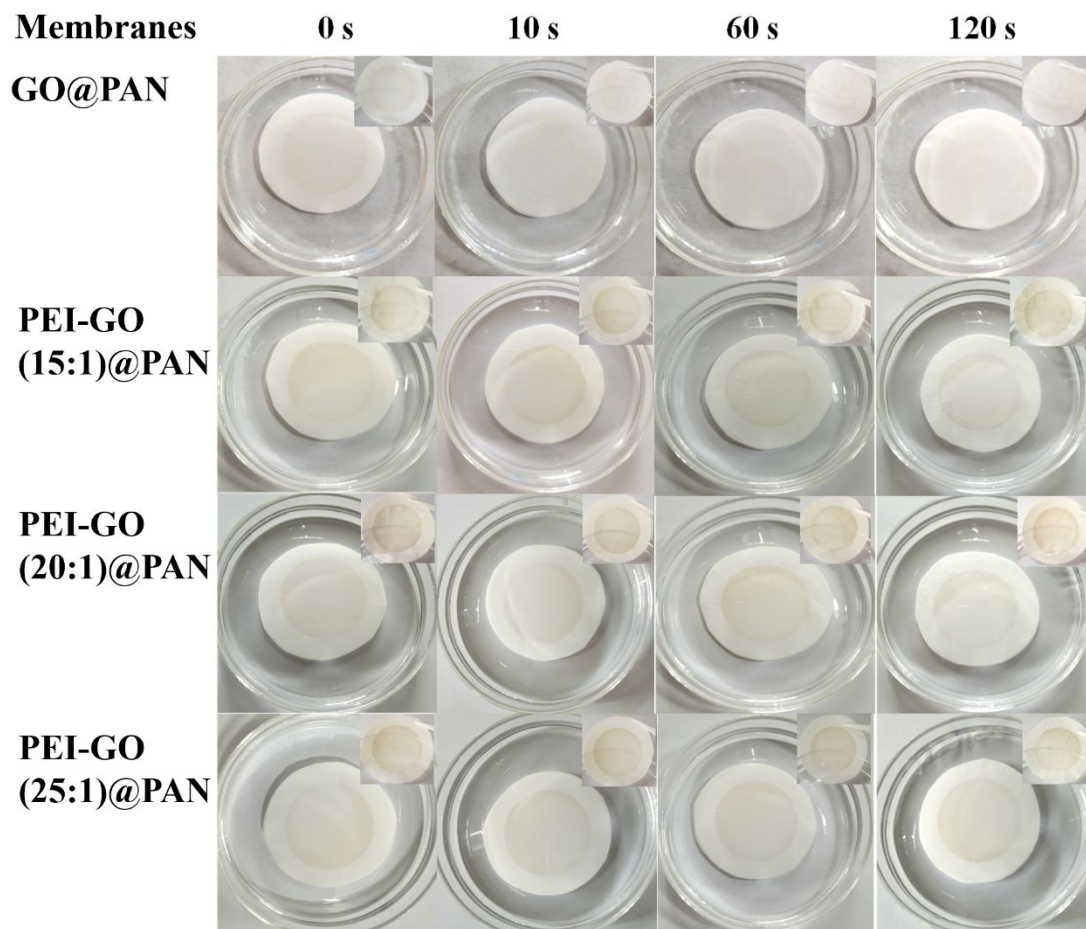

**Figure S5.** The ultrasound experiments result of GO@PAN membrane and PEI-GO@PAN membranes in water.

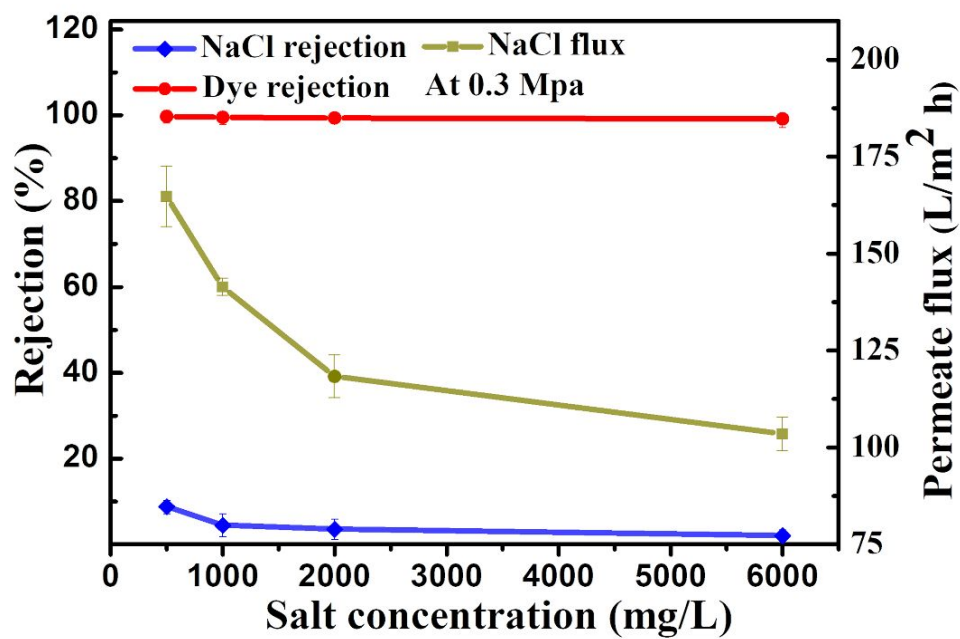

**Figure S6.** The dye/salt separation performance of the PEI-GO(15:1)@PAN membrane to NaCl solutions at various concentrations.

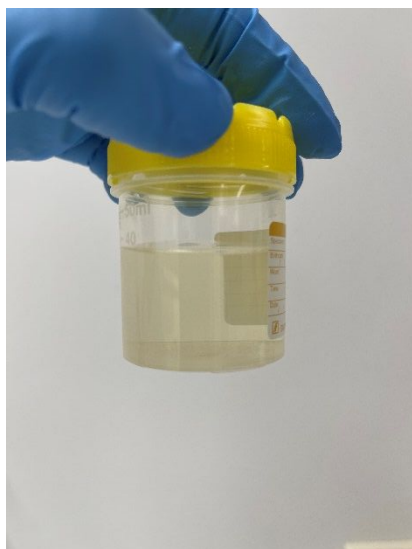

**Figure S7.** The photo of the 0.01 mg mL<sup>-1</sup> GO solution

**Table S1.** The content of chemical elements changes of GO and PEI-GO(15:1) from XPS spectra.

| Membrane | C1s At. % | O1s At. % | N1s At. % |
|----------|-----------|-----------|-----------|
| GO       | 70.0      | 30.0      |           |
| PEI-GO   | 66.5      | 16.7      | 16.8      |

**Table S2.** The diameter of hydrated ions.[1]

| Name                          | Hydrated Diameter (Å) |
|-------------------------------|-----------------------|
| Na <sup>+</sup>               | 7.16                  |
| Cl <sup>-</sup>               | 6.64                  |
| SO <sub>4</sub> <sup>2-</sup> | 7.58                  |

**Table S3.** The chemical structure and the front and side views of the ball-and-stick models of the hydrated dye molecules with maximum dimensions.[1, 2]

| Dyes               | Molecular Models<br>(Front View)                                                    | Molecular Models<br>(Side View)                                                       |
|--------------------|-------------------------------------------------------------------------------------|---------------------------------------------------------------------------------------|
| Columbia Blue (CB) | 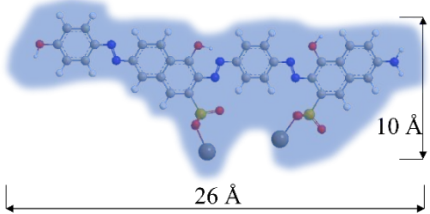   |    |
| Direct Red (DR 80) |    |    |
| Methyl Blue (MB)   |   |   |
| Congo Red (CR)     |  |  |
| Amaranth (AM)      |  |  |

Sunset Yellow (SY)

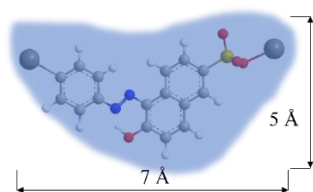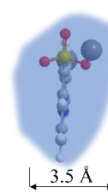



[1] Huang L., Huang S., Venna S. R. and Lin H., Rightsizing Nanochannels in reduced graphene oxide membranes by solvating for dye desalination, *Environmental science & technology*, 2018, **52**(21).

[2] Akbari A., Sheath P., Martin S. T., Shinde D. B., Shaibani M., Banerjee P. C., Tkacz R., Bhattacharyya D. and Majumder M., Large-area graphene-based nanofiltration membranes by shear alignment of discotic nematic liquid crystals of graphene oxide, *Nature communications*, 2016, **7**(1).
